# Supplementary material
Source: HighWire-hosted journal article supplement (https://www.cmajopen.ca/highwire/filestream/80916/field_highwire_adjunct_files/1/open-2014-0088-original-submission.pdf)
Supplement: open-2014-0088-original-submission.pdf [file open-2014-0088-original-submission.pdf]

1  
2  
3 **1 Trends in medical and non-medical immunization exemptions in Ontario: Annual cross-**  
4 **2 sectional assessment of students over eleven school years: 2002-03 to 2012-13.**

5  
6 3 Authors: Sarah E Wilson<sup>1,2</sup>, Chi Yon Seo<sup>1</sup>, Gillian H Lim<sup>1</sup>, Jill Fediurek<sup>1</sup>, Natasha S  
7 4 Crowcroft<sup>1,2,3</sup>, Shelley L Deeks<sup>1,2</sup>  
8  
9

10 5  
11 6 Author affiliations:

- 12  
13  
14 7 1. Public Health Ontario, Toronto, ON, Canada  
15 8 2. Dalla Lana School of Public Health, University of Toronto, Toronto, ON, Canada  
16 9 3. Department of Laboratory Medicine and Pathobiology, University of Toronto, Toronto,  
17 10 ON, Canada  
18  
19  
20 11

21 12 Corresponding author:

22  
23 13 Dr Sarah Wilson  
24 14 Immunization and Vaccine-Preventable Diseases, Public Health Ontario  
25 15 480 University Avenue, Suite 300  
26 16 Toronto, ON  
27 17 M5G 1V2  
28 18 647-260-7423  
29 19 [sarah.wilson@ohpp.ca](mailto:sarah.wilson@ohpp.ca)  
30  
31  
32  
33

34 22 Funding statement: This project was funded as part of the Public Health Ontario operational  
35 23 budget.  
36 24

37 25 Conflict of interest statement: No authors have any conflicts of interest to disclose.  
38 26

39 27 Key words: vaccine hesitancy, non-medical exemptions, school immunization requirements;  
40 28 immunization policy  
41  
42  
43 29

44 30 Contributor statements:

45 31 SW conceived of the study, directed the analyses, and drafted the article. CYS and GHM were  
46 32 involved in the acquisition of data and CYS executed the analyses presented. All authors  
47 33 substantially contributed to the interpretation of data, revised the manuscript critically for  
48 34 important intellectual content, gave final approval of the version to be published and agreed to act  
49 35 as guarantors of the work.  
50  
51  
52  
53  
54

54 38 Abstract length: 249

55 39 Manuscript length: 2,693  
56  
57  
58  
59  
60

1  
2  
3 41 **Abstract**  
4  
5  
6 42  
7  
8

9 43 **Background:** Under Ontario legislation, for select vaccine-preventable diseases un- or under-  
10  
11 44 immunized students must be vaccinated or provide a statement of exemption, otherwise risk  
12  
13 45 school suspension. At the time of this assessment, these included measles, mumps, rubella,  
14  
15 46 diphtheria, tetanus, and polio.  
16  
17

18  
19 47 **Methods:** Exemptions data were obtained from the Immunization Records Information System  
20  
21 48 (IRIS) for the school years of 2002-03 to 2012-13. Temporal trends were expressed for 7- and 17-  
22  
23 49 year-olds by exemption classification (medical, prior immunity, religious/conscientious belief,  
24  
25 50 total) at a provincial level, by school year and birth cohort. Regional analysis was conducted for  
26  
27 51 2012-13. Poisson distribution was used to examine the statistical significance of temporal trends  
28  
29 52 using a two-sided test with an alpha of 5%. Exemptions for measles-containing vaccines were the  
30  
31 53 focus of temporal trend analyses.  
32  
33  
34

35 54 **Results:** For both 7- and 17-year-old students, religious/conscientious exemptions for measles-  
36  
37 55 containing vaccines significantly increased over the study period (both age groups,  $p < 0.001$ ) and  
38  
39 56 medical exemptions decreased (both age groups,  $p < 0.001$ ). The trends were reproduced when  
40  
41 57 examined by birth cohort. The proportion of Ontario students with any exemption classification  
42  
43 58 (total exemptions) remained low ( $< 2.5\%$ ) over the period of analysis although considerable  
44  
45 59 geographic variation was noted.  
46  
47  
48  
49

50  
51 60  
52  
53  
54  
55  
56  
57  
58  
59  
60

1  
2  
3 61 **Interpretation:** Ontario data suggest that non-medical exemptions have increased over the last  
4  
5  
6 62 eleven years, consistent with trends reported elsewhere. The trend towards increasing  
7  
8 63 religious/conscientious exemptions coupled with declining medical exemptions explains why  
9  
10 64 total exemptions have remained stable or decreased, at a provincial level. The prominent  
11  
12 65 geographic variability in exemptions suggests that targeted interventions may be suitable for  
13  
14 66 consideration.  
15  
16  
17  
18  
19  
20  
21  
22  
23  
24  
25  
26  
27  
28  
29  
30  
31  
32  
33  
34  
35  
36  
37  
38  
39  
40  
41  
42  
43  
44  
45  
46  
47  
48  
49  
50  
51  
52  
53  
54  
55  
56  
57  
58  
59  
60

Confidential

## 67 **Background**

68  
69 There is increasing concern about vaccine hesitancy in Canada. In a 2011 Canadian  
70 survey of parental attitudes toward vaccination, half of parents felt that newer vaccines are less  
71 safe than older vaccines and 43% indicated they were more concerned about vaccine safety than  
72 they were five years ago [1]. There is limited literature to characterize vaccine hesitancy in  
73 Canada, although work is progressing in this area [2]. Investigators in the United States (US)  
74 have found evidence of increasing non-medical exemptions [3,4] which are presumed to reflect  
75 declining public confidence in immunization, and studies have linked geographical areas with  
76 high exemptions to vaccine-preventable disease (VPD) outbreaks [5,6]. In Ontario, there are  
77 communities who are known to be non-accepting of immunization on the basis of their religious  
78 beliefs. Several have been associated with recent VPD outbreaks [7,8].

79  
80 In Ontario, the *Immunization of School Pupils Act* (ISPA) requires that public health units  
81 (PHUs) maintain and assess the immunization records of students [9]. For nine “designated  
82 diseases”, students with incomplete immunizations must be vaccinated or provide a valid  
83 exemption statement, or else risk school suspension. Measles, mumps, rubella, diphtheria,  
84 tetanus, and polio have been long-standing designated diseases and in July 2014, varicella,  
85 invasive meningococcal disease and pertussis were added. The original 1982 legislation  
86 permitted only non-medical exemptions on religious grounds, but conscientious objections were  
87 added in a 1984 amendment [10]. Only New Brunswick has similarly comprehensive legislation  
88 pertaining to immunization requirements for school-entry [11].

89  
90 Our objective was to describe immunization exemptions to measles-containing vaccine  
91 (MCV) among Ontario students over the last eleven school years, and to compare the direction

1  
2  
3 92 and magnitude of trends in non-medical and medical exemptions to trends observed elsewhere.  
4  
5 93 We chose to focus on exemptions to MCV for two reasons. Firstly, we expected that there would  
6  
7  
8 94 be a greater number of medical exemptions as MCV is a live virus vaccine and certain immune-  
9  
10 95 compromising conditions are medical contraindications to immunization [12]. We also  
11  
12 96 anticipated that vaccine hesitant parents might be more concerned about MCV as compared to  
13  
14  
15 97 other vaccines, following the discredited hypothesis linking measles, mumps, rubella (MMR)  
16  
17 98 vaccine to autism [13].  
18  
19  
20 99

## 21 100 **Methods**

### 22 101 Processes for assessment of immunization coverage and exemptions in Ontario

23 102  
24 103  
25 104  
26 105 Ontario is Canada's largest province (population size 13.5 million); it has 36 PHUs which  
27  
28  
29 106 vary greatly in their geographic and population size and density. Under the Ontario Public Health  
30  
31 107 Standards, comprehensive immunization coverage assessment is conducted annually for all  
32  
33 108 school pupils within each PHU [14]. Under the ISPA, local Medical Officers of Health (MOHs)  
34  
35 109 maintain records of immunization and exemptions for all students [9]. If the appropriate  
36  
37 110 immunization information (or exemption statement) is not received, students may be suspended  
38  
39 111 until such documentation is provided. Between 1992 and 2014, the Immunization Records  
40  
41 112 Information System (IRIS), a collection of provincially-supported, decentralized databases was  
42  
43 113 used to support documentation and assessment. Over the course of 2013 and 2014, all PHUs  
44  
45 114 transitioned with a sequenced implementation schedule to Panorama, a centralized provincial  
46  
47 115 immunization repository. Exemptions were documented in IRIS by MMR vaccine until 2009-10,  
48  
49 116 and from 2010-11 onwards by measles antigen.  
50  
51  
52  
53  
54  
55 117

1  
2  
3 118 To register a non-medical exemption, the “Statement of Conscience or Religious Belief”  
4  
5  
6 119 must be completed and signed by the parent or guardian, or student themselves if 16 years of age  
7  
8 120 or older, and notarized [15]. The statement does not ask the individual to specify whether an  
9  
10 121 exemption on the basis of conscience or religious belief (C/RB) is claimed, thus analyses cannot  
11  
12 122 delineate between these two motivations. The “Statement of Medical Exemption” must be  
13  
14  
15 123 completed and signed by a physician or nurse practitioner. Medical exemptions are classified on  
16  
17 124 the Statement as being either “detrimental to health” or on the basis of laboratory confirmation of  
18  
19  
20 125 immunity for select diseases [16]. Individuals with a medical exemption on the basis of prior  
21  
22 126 immunity have a distinct exemption classification within IRIS. The collection, review and data  
23  
24 127 entry of exemptions occurs at a local level. At least annually, PHUs provide immunization  
25  
26  
27 128 coverage and exemption data in the form of in-application reports from IRIS containing  
28  
29 129 aggregate data by antigen and birth cohort to the provincial level, for the purposes of  
30  
31 130 immunization coverage surveillance. These represent the data source of all analyses.  
32  
33

34 131  
35 132  
36 133 Study population and methodology  
37 134

38  
39 135 Due to the scope of the ISPA, this analysis represents a true population-based assessment  
40  
41 136 of immunization exemptions in Ontario. We selected to focus on students 7 and 17 years of age,  
42  
43 137 in accordance with Canadian guidelines on age cohorts for routine coverage assessment [17].  
44  
45  
46 138

47  
48 139 Immunization exemptions were reviewed by classification for the six VPDs cited by the  
49  
50 140 ISPA at the time of immunization assessment for 2012-13, which occurred on June 30, 2013. For  
51  
52 141 the 2012-13 school year, the proportion of 7-year-old students with any type of exemption, and  
53  
54  
55 142 by exemption classification, was determined for each antigen provincially. PHU-specific  
56  
57 143 proportions among 7-year-olds were determined for non-medical and medical exemptions,  
58  
59  
60

1  
2  
3 144 excluding prior immunity, for MCV. PHUs were rank-ordered in a non-nominal fashion from  
4  
5 145 highest to lowest with regards to the proportion of 7-year-olds with a non-medical exemption to  
6  
7 146 MCV. A number was assigned to each of the 36 PHUs based on their relative ranking with  
8  
9 147 regards to the proportion of 7-year-old students with a non-medical exemption to MCV (ranked  
10  
11 148 from highest to lowest), with this number preserved when assessing the distribution of PHUs  
12  
13 149 with regards to medical exemptions. Due to limitations of IRIS, it was not possible to estimate  
14  
15 150 the number of unique students with an exemption to any antigen in 2012-13 or previous school  
16  
17 151 years.  
18  
19  
20  
21  
22 152

23  
24 153           Immunization exemptions among 7- and 17-year-old students for MCV over the school  
25  
26 154 years of 2002-03 to 2012-13 were examined. Trends in exemptions were assessed for 7- and 17-  
27  
28 155 year-olds at the provincial level by classification: medical (excluding prior immunity), prior  
29  
30 156 immunity, and C/RB. We also examined trends in total exemptions defined as the sum of  
31  
32 157 medical, prior immunity, and C/RB exemptions. We examined these by school year, examining  
33  
34 158 7- and 17-year old students separately over the period of 2002-03 to 2012-13. We also assessed  
35  
36 159 temporal trends using a birth cohort approach which explored exemptions for 7- and 17-year old  
37  
38 160 students, assessed by year of birth (1985 to 2005). For analyses of temporal trends in medical  
39  
40 161 exemptions, we continued to examine students with prior immunity as a distinct classification.  
41  
42 162 The statistical significance of temporal trends was assessed using a Poisson distribution, using a  
43  
44 163 two-sided test with an alpha of 5%.  
45  
46  
47  
48  
49  
50  
51 164

52  
53  
54 165           Following the transfer of surveillance functions to Public Health Ontario (PHO) in 2011,  
55  
56 166 PHO has validated local coverage and exemptions data with PHUs before their inclusion in  
57  
58  
59  
60

1  
2  
3 167 reports and related analyses. Exemptions and coverage data prior to 2010-11 did not undergo this  
4  
5 168 step. For the analyses reported here, PHU-specific exemption data from the time period pre-  
6  
7  
8 169 dating routine validation (2002-03 to 2010-11) were reviewed. For PHUs with small population  
9  
10 170 sizes and for any PHU where the 17 year old cohort was smaller than 50% of the 7 year old  
11  
12 171 cohort, further review was undertaken. The 17 year old birth cohort was assessed in relation to  
13  
14  
15 172 the size of the same cohort (i.e. same year of birth) in the previous school year, where available.  
16  
17 173 If this was not available, the size of the birth cohort comprised of 16 year olds was reviewed for  
18  
19  
20 174 the same school year. We excluded PHU-specific data for a particular school year if the size of  
21  
22 175 the 17 year old birth cohort was less than 60% of the comparator birth cohort.  
23  
24

25 176  
26 177 Ethics statement  
27 178

28 179 This project was assessed through PHO's ethics screening process [18] and was found to  
29  
30  
31 180 not require additional ethics review.  
32  
33

34 181  
35 182 **Results**  
36

37  
38 183 The distribution of exemption classifications among 7-year-olds in Ontario in the 2012-13  
39  
40 184 school year, for ISPA designated diseases at the time of assessment, are represented in Figure 1.  
41  
42 185 Total exemptions were highest against polio-containing vaccine (2.4%) and lowest against  
43  
44 186 mumps and rubella (1.4%). Of the three categories of exemptions captured in IRIS, C/RB  
45  
46 187 exemptions accounted for the greatest proportion of total exemptions, responsible for 89% of all  
47  
48 188 exemptions registered in 2012-2013 in this age group (13,559/15,307). Provincial estimates  
49  
50 189 obscure prominent variability by individual PHU, which ranged from 0.7 to 7.5% for exemptions  
51  
52  
53 190 due to C/RB (Figure 2A). Less variability was noted in medical exemptions (range 0% to 1.8%,  
54  
55  
56  
57  
58  
59  
60



1  
2  
3 191 Figure 2B). PHUs with the highest proportions of non-medical exemptions differ from those with  
4  
5  
6 192 greater proportions of students with medical exemptions (Figure 2B).  
7

8 193  
9  
10 194 Data cleaning of historical exemptions data on the basis of birth cohort size resulted in the  
11  
12 195 exclusion of 69 PHU-specific estimates out of a total of 398 PHU-specific estimates for 17-year  
13  
14  
15 196 olds over the 11 years of analysis. The exclusions had no impact on the overall proportion of total  
16  
17 197 exemptions across the study period for this age group: total exemptions were 1.8% with  
18  
19 198 (26,586/1,476,321) and without (27,736/1,530,165) the above-noted exclusions. When assessed  
20  
21  
22 199 by trends across school years, C/RB exemptions increased among 17-year-olds, (0.6 to 1.1%,  
23  
24 200  $p < 0.0001$ ) with a more pronounced decrease in medical exemptions (0.8% to 0.2%,  $p < 0.0001$ )  
25  
26 201 resulting in a decrease in total exemptions over time (1.9% to 1.4%,  $p < 0.0001$ ) (Figure 3A).  
27  
28  
29 202 Similar trends were noted among 7-year-olds (Figure 3B).  
30  
31

32 203 The birth cohort approach revealed a doubling in the proportions of students with C/RB  
33  
34 204 exemptions to MCV over a 20 year time period, from 0.6% among students born in 1985 to 1.5%  
35  
36 205 for students born in 2005 ( $p < 0.0001$ ) and a significant decline in medical exemptions (0.8% for  
37  
38 206 students born in 1985 to 0.2% for students born in 2005,  $p < 0.0001$ ) (Figures 4A, 4B). Over the  
39  
40  
41 207 20 birth cohorts of interest, exemptions claimed on the basis of prior immunity to measles  
42  
43  
44 208 (natural infection) decreased from 0.5% to 0.1% ( $p < 0.0001$ ) (data not shown).  
45

46 209  
47 210  
48 211

## 211 Interpretation

50  
51 212 This is the first comprehensive assessment of immunization exemptions conducted in  
52  
53 213 Canada. To our knowledge, only one previous study has examined Ontario exemptions; it  
54  
55  
56 214 examined exemptions data from only two school years, focused on the ratio of exemptions due to  
57  
58  
59  
60

1  
2  
3 215 C/RB as compared to medical exemptions, and did not explore PHU variability [19]. Our analysis  
4  
5 216 provides important insight into trends of vaccine refusal within Canada's largest province and  
6  
7 217 demonstrates that non-medical exemptions to MCV have significantly increased over time,  
8  
9 218 although the absolute magnitude remains low provincially at less than 2%. As demonstrated by  
10  
11 219 our more detailed assessment of the 2012-13 school year, regional variability is marked.  
12  
13 220 Analyses at a smaller area level, such as individual schools, even among PHUs with 'low' levels  
14  
15 221 of exemptions serve to further illustrate this [20], as does analysis of exemptions by income  
16  
17 222 quintile [21]. We were not able to explore this further at the provincial level due to IRIS  
18  
19 223 limitations.  
20  
21  
22  
23  
24  
25  
26

27 225 The trends observed in non-medical exemptions are comparable, although in some cases  
28  
29 226 smaller in magnitude, to what has been observed in the US. In a recent analysis of secular trends  
30  
31 227 in personal belief exemptions among California kindergarten students, the state level exemption  
32  
33 228 rate increased from 0.6% in 1994 to 2.3% in 2009, an average annual increase of 9.2% [4].  
34  
35 229 Analyses from Michigan found the mean non-medical exemption rate by census tract increased  
36  
37 230 from 1.9% in 1991 to 5.2% in 2004 [5]. Regional variability in exemptions is well documented  
38  
39 231 and in some US states more marked than what we observed, with some counties documenting  
40  
41 232 non-medical exemption rates as high as 25% [3].  
42  
43  
44  
45  
46  
47

48 234 There are few studies in the literature examining medical exemptions [22,23] and none  
49  
50 235 have examined temporal trends directly. Instead, their focus has been to assess the relationship  
51  
52 236 between medical exemptions and state-level policies or intervention studies targeting providers  
53  
54 237 [22,23]. There are several hypotheses for the significant decline in medical exemptions noted in  
55  
56 238 our analyses including greater clinician awareness regarding true immunization contraindications  
57  
58  
59  
60

1  
2  
3 239 versus precautions and expanded expert guidance on immunization practice in this area [24]. In  
4  
5 240 the 4<sup>th</sup> edition of the Canadian Immunization Guide, released in 1994, the National Advisory  
6  
7 241 Committee on Immunization (NACI) recommended routine skin testing for any individual with  
8  
9 242 an egg allergy, with guidance to administer MMR using a graded challenge under continuous  
10  
11 243 observation for those with a positive skin test [25]. This recommendation was revised in 1998  
12  
13 244 following a literature review which found no evidence of increased risk of anaphylaxis associated  
14  
15 245 with egg allergy [26]. This change could explain the notable drop in medical exemptions  
16  
17 246 observed in the birth cohorts born between 1993 and 1995. An alternate explanation for the  
18  
19 247 decline in medical exemptions is that Ontario parents may now be more aware of the ability to  
20  
21 248 opt-out of immunization requirements through an exemption claimed on C/RB and may make  
22  
23 249 fewer requests for medical exemptions. Because medical exemptions due to prior immunity are  
24  
25 250 classified separately, declining numbers of children with naturally acquired measles antibody due  
26  
27 251 to previous wild type infection in the post-measles elimination era cannot explain these trends.  
28  
29  
30  
31  
32  
33  
34  
35

36 253 The strengths of this assessment lie with the comprehensive scope of the ISPA and the  
37  
38 254 time period captured by our analyses. The temporal trends in immunization exemptions described  
39  
40 255 represent a true population-level assessment of exemptions among Ontario's school-aged  
41  
42 256 population over 11 school years, representing children born over a 20 year period (1985 to 2005),  
43  
44 257 during which notable shifts in public confidence in vaccination have occurred. However, this  
45  
46 258 assessment has several limitations, which primarily relate to the lack of individual-level data  
47  
48 259 available for analysis. Due to the nature of the IRIS reports available at the provincial level, PHU  
49  
50 260 is the smallest geographic level by which exemptions are reported, obscuring spatial clustering at  
51  
52 261 a smaller area level. Other limitations include an inability to examine exemptions across the  
53  
54 262 range of ISPA antigens, in order to document the proportion of Ontario students with an  
55  
56  
57  
58  
59  
60

1  
2  
3 263 immunization exemption to at least one ISPA antigen. A further limitation was our inability to  
4  
5 264 explore the individual immunization status of students with and without exemptions. Other  
6  
7  
8 265 studies have demonstrated that some students with immunization exemptions will have been  
9  
10 266 immunized against the particular antigen [27,28]. In contrast, data from Australia, suggest that  
11  
12 267 the proportion of children who have received no vaccines is approximately twice as high as the  
13  
14  
15 268 proportion of children who have a documented exemption [29]. Finally, due to the current  
16  
17 269 wording of the ISPA, exemptions due to conscience and religious belief are captured together,  
18  
19 270 preventing us from delineating trends for these separately. We presume the increase observed has  
20  
21 271 been driven by conscientious objection, rather than secular trends in religious beliefs or  
22  
23 272 significant population expansion of religious groups in Ontario who are known to be non-  
24  
25  
26  
27 273 accepting of immunization.

28  
29 274 Other investigators have found that for both medical and non-medical exemptions, US  
30  
31 275 states with more stringent administrative criteria are more likely to have lower rates of medical  
32  
33 276 and non-medical exemptions, and a lower rate of increase for non-medical exemptions [22,30]. In  
34  
35 277 addition, states that have more stringent requirements for non-medical exemptions are more  
36  
37 278 likely to have higher rates of medical exemptions [22]. With regards to administrative complexity  
38  
39 279 to obtain a medical exemption, Ontario would be classified as “easy”, scoring one out of a  
40  
41 280 possible six criteria proposed by Stadlin et al. [22]. Ontario’s requirement for notarization of the  
42  
43  
44 281 parental statement of religious or personal belief objection, which as of July 2013 can be obtained  
45  
46  
47 282 online, would be classified as somewhere in the middle with respect to the administrative  
48  
49 283 complexity to obtain a non-medical exemption [30]. However, many US states have more  
50  
51 284 stringent processes, including healthcare provider documentation that the parent has been  
52  
53 285 counselled regarding the risks and benefits of immunization and of VPDs [31]. Other  
54  
55  
56 286 jurisdictions have adopted more targeted interventions focusing on geographical regions, or  
57  
58  
59  
60

1  
2  
3 287 providers associated with high levels of exemptions [23]. Despite the ISPA, two doses measles  
4  
5 288 coverage was 88% among 7-year-olds and 95% among 17-year-olds in the 2012-13 school year  
6  
7  
8 289 [32], underscoring the need to have parallel approaches to both improve coverage and decrease  
9  
10 290 exemptions, particularly among younger students.

11  
12  
13 291  
14 292 **Conclusion**

15  
16 293 This assessment confirms that non-medical exemptions have increased in Ontario over the  
17  
18 294 last 11 school years, consistent with trends reported elsewhere. The general trend towards  
19  
20 295 increasing religious/conscientious exemptions coupled with declining medical exemptions  
21  
22 296 explains why total exemptions have remained stable or decreased, at a provincial level. Despite  
23  
24 297 relatively low levels of non-medical exemptions provincially, there is marked variability by PHU  
25  
26 298 suggesting the potential role for targeted interventions. These should be tailored and sensitive to  
27  
28 299 whether exemptions are on the basis of religious belief, or conscientious objection.

30  
31  
32  
33 300  
34 301

35  
36 302 **Acknowledgements**

37  
38 303 The authors sincerely extend their thanks to the staff of Ontario's 36 Public Health Units  
39  
40 304 (PHUs) who are involved in the assessment of immunization records and the documentation of  
41  
42 305 immunization exemptions and to colleagues at the Ontario Ministry of Health and Long-Term  
43  
44 306 Care for their assistance with the interpretation of IRIS data and reports.

45  
46  
47  
48 307  
49 308

50 309 **References**

51 310  
52 311 <sup>1</sup>. Ekos Research Associates Inc. Survey of Parents on Key Issues Related to Immunization.  
53 312 Ottawa: Public Health Agency of Canada, 2011. Available at:  
54 313 <http://resources.cpha.ca/immunize.ca/data/1792e.pdf> [Cited Feb. 14, 2014].  
55 314

- 1  
2  
3 315 2. Laberge C, Guay M, Clément P, Bramadat P, Dubé E, Roy R, et al. Workshop on the cultural  
4 316 and religious roots of vaccine hesitancy: Explanations and implications for the Canadian  
5 317 healthcare. Available at: [http://www.usherbrooke.ca/dep-sciences-sante-](http://www.usherbrooke.ca/dep-sciences-sante-communautaire/fileadmin/sites/dep-sciences-sante-communautaire/documents/HesitationVaccination/AfficheMG-anglais.pdf)  
6 318 [communautaire/fileadmin/sites/dep-sciences-sante-](http://www.usherbrooke.ca/dep-sciences-sante-communautaire/fileadmin/sites/dep-sciences-sante-communautaire/documents/HesitationVaccination/AfficheMG-anglais.pdf)  
7 319 [communautaire/documents/HesitationVaccination/AfficheMG-anglais.pdf](http://www.usherbrooke.ca/dep-sciences-sante-communautaire/fileadmin/sites/dep-sciences-sante-communautaire/documents/HesitationVaccination/AfficheMG-anglais.pdf) [Cited Feb. 14, 2014].  
8 320  
9 321  
10 322 3. Omer SB, Salmon DA, Orenstein WA, deHart MP, Halsey N. Vaccine refusal, mandatory  
11 323 immunization, and the risks of vaccine-preventable diseases. *N Engl J Med*. 2009 May  
12 324 7;360(19):1981-8. doi: 10.1056/NEJMsa0806477.  
13 325  
14 326 4. Richards JL, Wagenaar BH, Van Otterloo J, Gondalia R, Atwell JE, Kleinbaum DG, Salmon  
15 327 DA, Omer SB. Nonmedical exemptions to immunization requirements in California: a 16-year  
16 328 longitudinal analysis of trends and associated community factors. *Vaccine*. 2013 Jun  
17 329 24;31(29):3009-13. doi: 10.1016/j.vaccine.2013.04.053. Epub 2013 May 10.  
18 330  
19 331 5. Omer S, Enger K, Moulton L, Halsey N, Stokley S, Salmon D. Geographic clustering of  
20 332 nonmedical exemptions to school immunization requirements and associations with geographic  
21 333 clustering of pertussis. *Am J Epidemiol*. 2008;168(12):1389-96.  
22 334  
23 335 6. Atwell JE, Van Otterloo J, Zipprich J, Winter K, Harriman K, Salmon DA, Halsey NA, Omer  
24 336 SB. Nonmedical vaccine exemptions and pertussis in California, 2010. *Pediatrics*. 2013  
25 337 Oct;132(4):624-30. doi: 10.1542/peds.2013-0878.  
26 338  
27 339 7. Hahné S, Macey J, Tipples G, et al. . Rubella outbreak in an unvaccinated religious community  
28 340 in the Netherlands spreads to Canada. *EuroSurveill* 2005;10:E050519.1.  
29 341 <http://www.eurosurveillance.org/ViewArticle.aspx?ArticleId=2704>.  
30 342  
31 343 8. Deeks SL, Lim GH, Walton R, Fediurek J, Lam F, Walker C, Walters J, Crowcroft NS.  
32 344 Prolonged pertussis outbreak in Ontario originating in an under-immunized religious community.  
33 345 *CCDR* 2014;40(3). Available at: [http://www.phac-aspc.gc.ca/publicat/ccdr-rmtc/14vol40/dr-](http://www.phac-aspc.gc.ca/publicat/ccdr-rmtc/14vol40/dr-rm40-03/dr-rm40-03-ont-eng.php)  
34 346 [rm40-03/dr-rm40-03-ont-eng.php](http://www.phac-aspc.gc.ca/publicat/ccdr-rmtc/14vol40/dr-rm40-03/dr-rm40-03-ont-eng.php)  
35 347  
36 348 9. *Immunization of School Pupils Act*, R.R.O. 1990, Reg. 645. Available from: [http://www.e-](http://www.e-laws.gov.on.ca/html/regs/english/elaws_regs_900645_e.htm)  
37 349 [laws.gov.on.ca/html/regs/english/elaws\\_regs\\_900645\\_e.htm](http://www.e-laws.gov.on.ca/html/regs/english/elaws_regs_900645_e.htm)  
38 350  
39 351 10. Arnup, K. 'Victims of Vaccination'?: Opposition to Compulsory Immunization in Ontario,  
40 352 1900–90. *Canadian Bulletin of Medical History* 1992;9: 159–76.  
41 353  
42 354 11. New Brunswick. Office of the Chief Medical Officer of Health (Public Health).  
43 355 Immunization program guide: policy 2.19 - required immunization of school children [Internet].  
44 356 Fredericton, NB: Government of New Brunswick; 2012 [cited 2014 Jun 17]. Available from:  
45 357 [http://www2.gnb.ca/content/dam/gnb/Departments/h-s/pdf/en/CDC/HealthProfessionals/NBIPG-](http://www2.gnb.ca/content/dam/gnb/Departments/h-s/pdf/en/CDC/HealthProfessionals/NBIPG-policy2-9-e.pdf)  
46 358 [policy2-9-e.pdf](http://www2.gnb.ca/content/dam/gnb/Departments/h-s/pdf/en/CDC/HealthProfessionals/NBIPG-policy2-9-e.pdf)  
47 359  
48 360 12. National Advisory Committee on Immunization; Public Health Agency of Canada. Canadian  
49 361 immunization guide [Internet]. Evergreen ed. Ottawa, ON: Her Majesty the Queen in Right of  
50  
51  
52  
53  
54  
55  
56  
57  
58  
59  
60

- 1  
2  
3 360 Canada; [cited 2012 Nov 30]. Part 4: active vaccines: measles vaccine. Available from:  
4 361 <http://www.phac-aspc.gc.ca/publicat/cig-gci/p04-meas-roug-eng.php>  
5 362
- 6  
7 363 13. Brown KF, Long SJ, Ramsay M, Hudson MJ, Green J, Vincent CA, Kroll JS, Fraser G,  
8 364 Sevdalis N. U.K. parents' decision-making about measles-mumps-rubella (MMR) vaccine 10  
9 365 years after the MMR-autism controversy: a qualitative analysis. *Vaccine*. 2012 Feb  
10 366 27;30(10):1855-64. doi: 10.1016/j.vaccine.2011.12.127.  
11 367
- 12 368 14. Ontario. Ministry of Health and Long-Term Care. Immunization management protocol.  
13 369 Toronto, ON: Queen's Printer for Ontario; 2013. Available from:  
14 370 [http://www.health.gov.on.ca/en/pro/programs/  
15 371 publichealth/oph\\_standards/docs/immunization\\_management.pdf](http://www.health.gov.on.ca/en/pro/programs/publichealth/oph_standards/docs/immunization_management.pdf)  
16 372
- 17 373 15. Ontario Ministry of Health and Long-Term Care. Statement of conscience or religious belief,  
18 374 Immunization of School Pupils Act. Available at:  
19 375 [http://www.forms.ssb.gov.on.ca/mbs/ssb/forms/ssbforms.nsf/GetFileAttach/014-4897-  
20 376 64E~1/\\$File/4897-64E.pdf](http://www.forms.ssb.gov.on.ca/mbs/ssb/forms/ssbforms.nsf/GetFileAttach/014-4897-64E~1/$File/4897-64E.pdf) [Cited Feb. 14, 2014].  
21 377
- 22 378 16. Ontario Ministry of Health and Long-Term Care. Statement of Medical Exemption,  
23 379 Immunization of School Pupils Act. Available at:  
24 380 [http://www.forms.ssb.gov.on.ca/mbs/ssb/forms/ssbforms.nsf/GetFileAttach/014-4895-  
25 381 64E~1/\\$File/4895-64E.pdf](http://www.forms.ssb.gov.on.ca/mbs/ssb/forms/ssbforms.nsf/GetFileAttach/014-4895-64E~1/$File/4895-64E.pdf) [Cited Feb. 14, 2014].  
26 382
- 27 383 17. National standards for immunization coverage assessment: recommendations from the  
28 384 Canadian Immunization Registry Network. *Can Comm Dis Report*. 2005;31(9):93-7. Available  
29 385 from: [http://www.phac-aspc.gc.ca/  
30 386 publicat/ccdr-rmtc/05vol31/dr3109a-eng.php](http://www.phac-aspc.gc.ca/publicat/ccdr-rmtc/05vol31/dr3109a-eng.php)  
31 387
- 32 388 18. Ontario Agency for Health Protection and Promotion (Public Health Ontario). A framework  
33 389 for the ethical conduct of public health initiatives. Toronto, ON: Queen's Printer for Ontario;  
34 390 2012.  
35 391
- 36 392 19. Mah CL, Guttman A, McGeer A, Krahn M, Deber RB. Compulsory school-entry  
37 393 vaccination laws and exemptions: who is opting out in Ontario and why does it matter?  
38 394 *Healthcare Policy*. 2010 May;5(4):37-46.  
39 395
- 40 396 20. Global News. Which Toronto schools have the lowest vaccination rates? Internet. [Cited 2014  
41 397 Aug 12].  
42 398 [http://globalnews.ca/news/1241099/interactive-measles-vaccination-rates-for-every-school-in-  
43 399 toronto/?utm\\_source=twitterfeed&utm\\_medium=twitter](http://globalnews.ca/news/1241099/interactive-measles-vaccination-rates-for-every-school-in-toronto/?utm_source=twitterfeed&utm_medium=twitter)  
44 400
- 45 401 21. Toronto Public Health. Board of Health Report: Inequalities and immunization rates in  
46 402 Toronto school children. January 5, 2012. Available from  
47 403 <http://www.toronto.ca/legdocs/mmis/2012/hl/bgrd/backgroundfile-44266.pdf>  
48 404
- 49 405 22. Stadlin S, Bednarczyk RA, Omer SB. Medical exemptions to school immunization  
50 406 requirements in the United States--association of state policies with medical exemption rates  
51  
52  
53  
54  
55  
56  
57  
58  
59  
60



- 1  
2  
3 407 (2004-2011). *J Infect Dis*. 2012 Oct 1;206(7):989-92. doi: 10.1093/infdis/jis436. Epub 2012 Aug  
4 408 29.  
5 409  
6 410  
7 411 23. Cruze AR, Zhang G, Thomas L, Alonso J, Sandoval L. Frequency and erroneous usage of  
8 412 temporary medical exemptions and knowledge of immunization guidelines among some Miami-  
9 413 Dade County Florida providers. *Vaccine*. 2014 Jul 31;32(35):4500-4. doi:  
10 414 10.1016/j.vaccine.2014.06.041.  
11 415  
12 416 24. National Advisory Committee on Immunization; Public Health Agency of Canada. Canadian  
13 417 immunization guide [Internet]. Evergreen ed. Ottawa, ON: Her Majesty the Queen in Right of  
14 418 Canada; [cited 2014 Aug 12]. Part 2: vaccine safety: contraindications, precautions and concerns.  
15 419 Available from: <http://www.phac-aspc.gc.ca/publicat/cig-gci/p02-02-eng.php>  
16 420  
17 421 25. National Advisory Committee on Immunization; Health Canada. Canadian immunization  
18 422 guide. Fourth ed., 1994. Ottawa, ON: Her Majesty the Queen in Right of Canada.  
19 423  
20 424 26. National Advisory Committee on Immunization; Health Canada. Canadian immunization  
21 425 guide. Fifth ed., 1998. Ottawa, ON: Her Majesty the Queen in Right of Canada.  
22 426  
23 427 27. Salmon DA, Moulton LH, Omer SB, DeHart MP, Stokley S, Halsey NA. Factors associated  
24 428 with refusal of childhood vaccines among parents of school-aged children: A case-control study.  
25 429 *Arch Pediatr Adolesc Med*. 2005;159(5):470-6.  
26 430  
27 431 28. Salmon DA, Sotir MJ, Pan WK, Berg JL, Omer SB, Stokley S, et al. Parental vaccine refusal  
28 432 in Wisconsin: A case-control study. *WMJ*. 2009;108(1):17-23.  
29 433  
30 434 29. Hull B, Dey A, Mahajan D, Campbell-Lloyd S, Menzies R, McIntyre P. NSW annual  
31 435 immunisation coverage report, 2009. *N S W Public Health Bull*. 2010;21(9-10):210-23.  
32 436  
33 437 30. Omer SB, Richards JL, Ward M, Bednarczyk RA. Vaccination policies and rates of  
34 438 exemption from immunization, 2005-2011. *N Engl J Med*. 2012 Sep 20;367(12):1170-1.  
35 439  
36 440 31. California Legislative Information. Assembly Bill No. 2109: Communicable Disease  
37 441 Immunization Exemption. Available at:  
38 442 [http://leginfo.legislature.ca.gov/faces/billNavClient.xhtml?bill\\_id=201120120AB2109](http://leginfo.legislature.ca.gov/faces/billNavClient.xhtml?bill_id=201120120AB2109)  
39 443  
40 444 32. Ontario Agency for Health Protection and Promotion (Public Health Ontario). Immunization  
41 445 coverage report for school pupils. 2012-13 school year. Toronto, ON: Queen's Printer for  
42  
43  
44  
45  
46  
47  
48  
49  
50  
51  
52  
53  
54  
55  
56  
57  
58  
59  
60



Figure 1: Exemptions by classification among 7-year-old Ontario students: 2012-13 school year

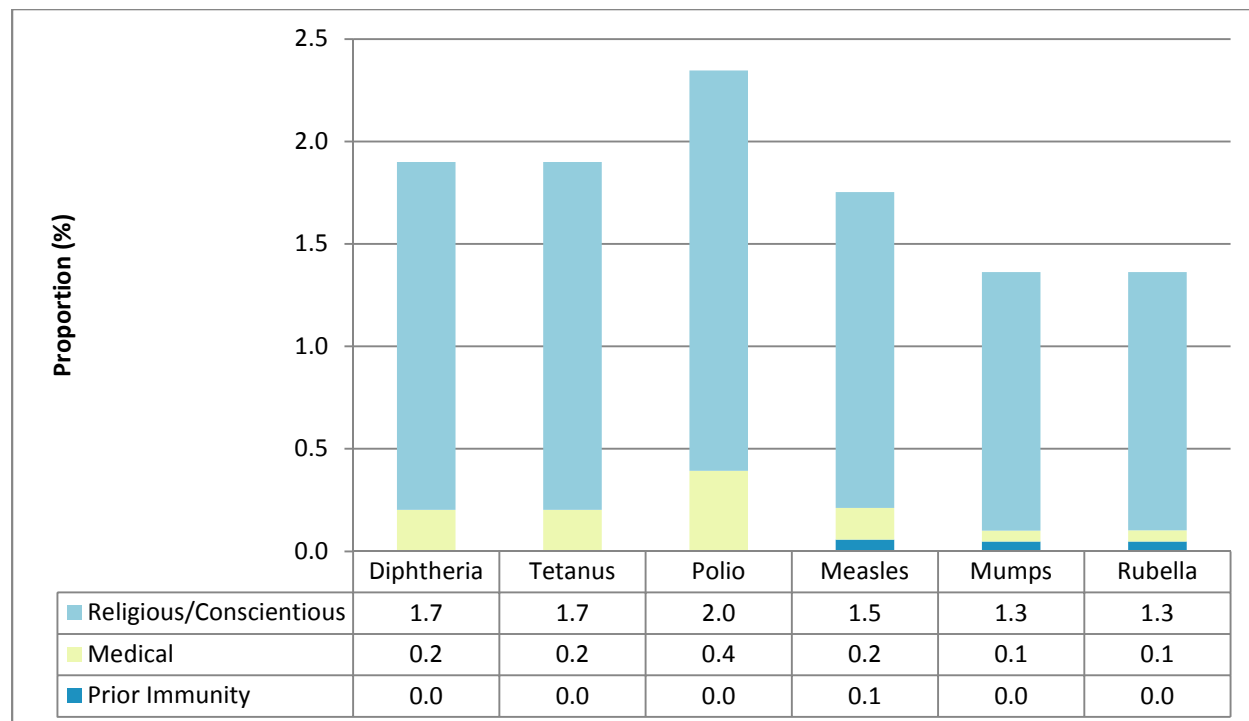

1  
2  
3  
4  
5  
6  
7  
8  
9  
10  
11  
12  
13  
14  
15  
16  
17  
18  
19  
20  
21  
22  
23  
24  
25  
26  
27  
28  
29  
30  
31  
32  
33  
34  
35  
36  
37  
38  
39  
40  
41  
42  
43  
44  
45  
46  
47  
48  
49  
50  
51  
52  
53  
54  
55  
56  
57  
58  
59  
60

**Figure 2A: Proportion of 7-year-old students with an exemption to measles containing vaccine due to religious or conscientious belief, by Ontario Public Health Unit: 2012-13 school year**

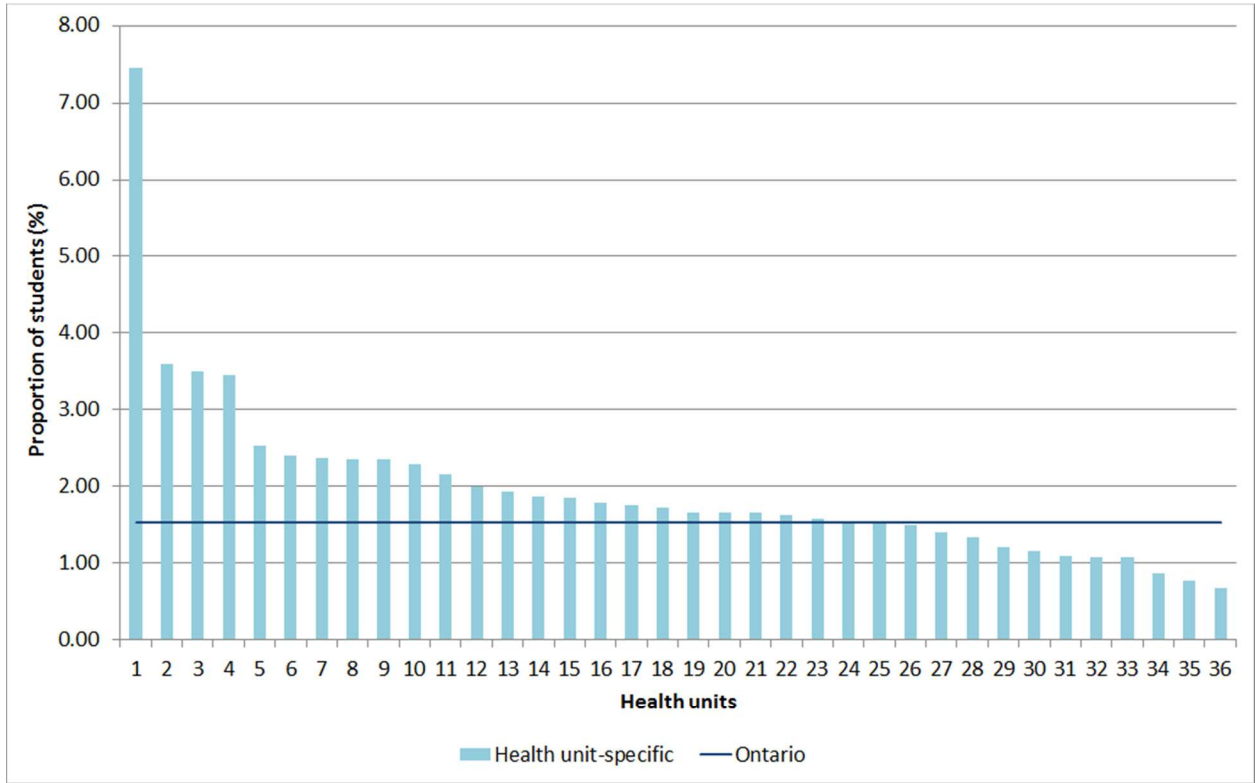

Figure 2B: Proportion of 7-year-old students with a medical exemption to measles containing vaccine, by Ontario Public Health Unit: 2012-13 school year

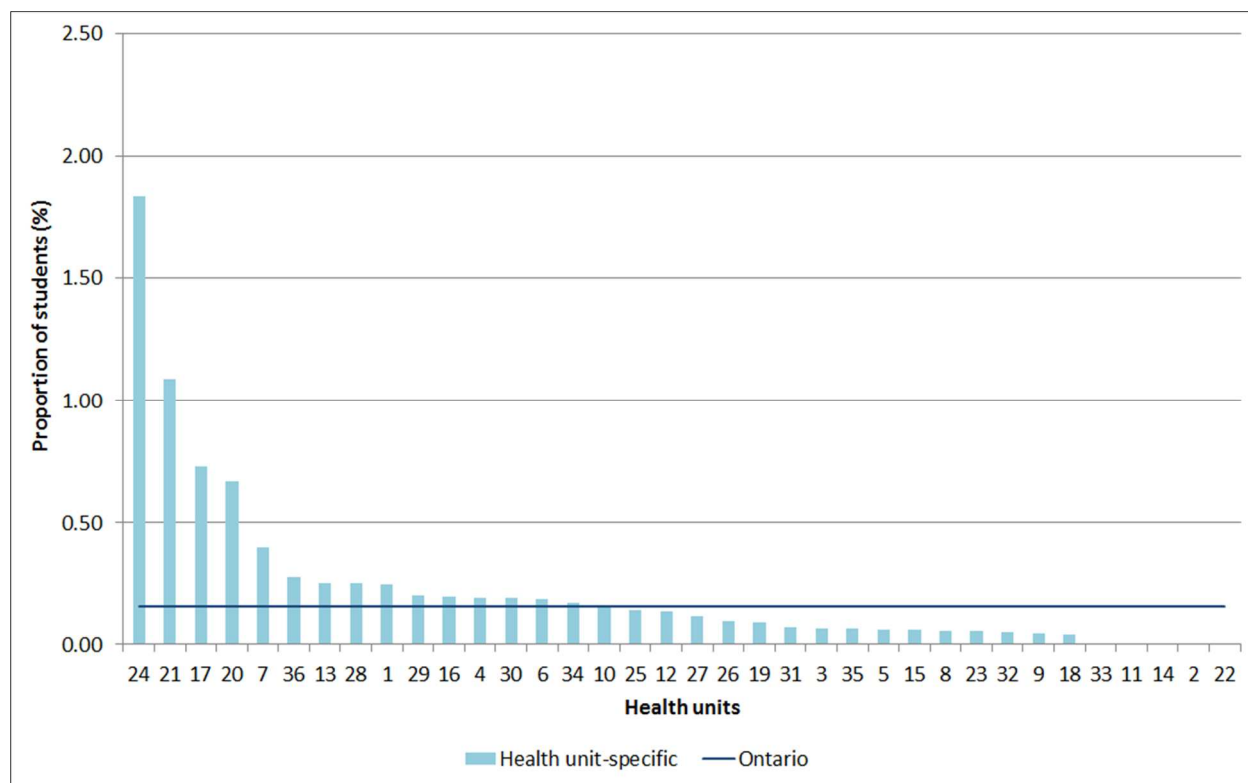

1  
2  
3  
4  
5  
6  
7  
8  
9  
10  
11  
12  
13  
14  
15  
16  
17  
18  
19  
20  
21  
22  
23  
24  
25  
26  
27  
28  
29  
30  
31  
32  
33  
34  
35  
36  
37  
38  
39  
40  
41  
42  
43  
44  
45  
46  
47  
48  
49  
50  
51  
52  
53  
54  
55  
56  
57  
58  
59  
60

**Figure 3A: Temporal trends in immunization exemptions to measles containing vaccine among 17-year-old Ontario students, by exemption classification: 2002-3 to 2012-13 school years**

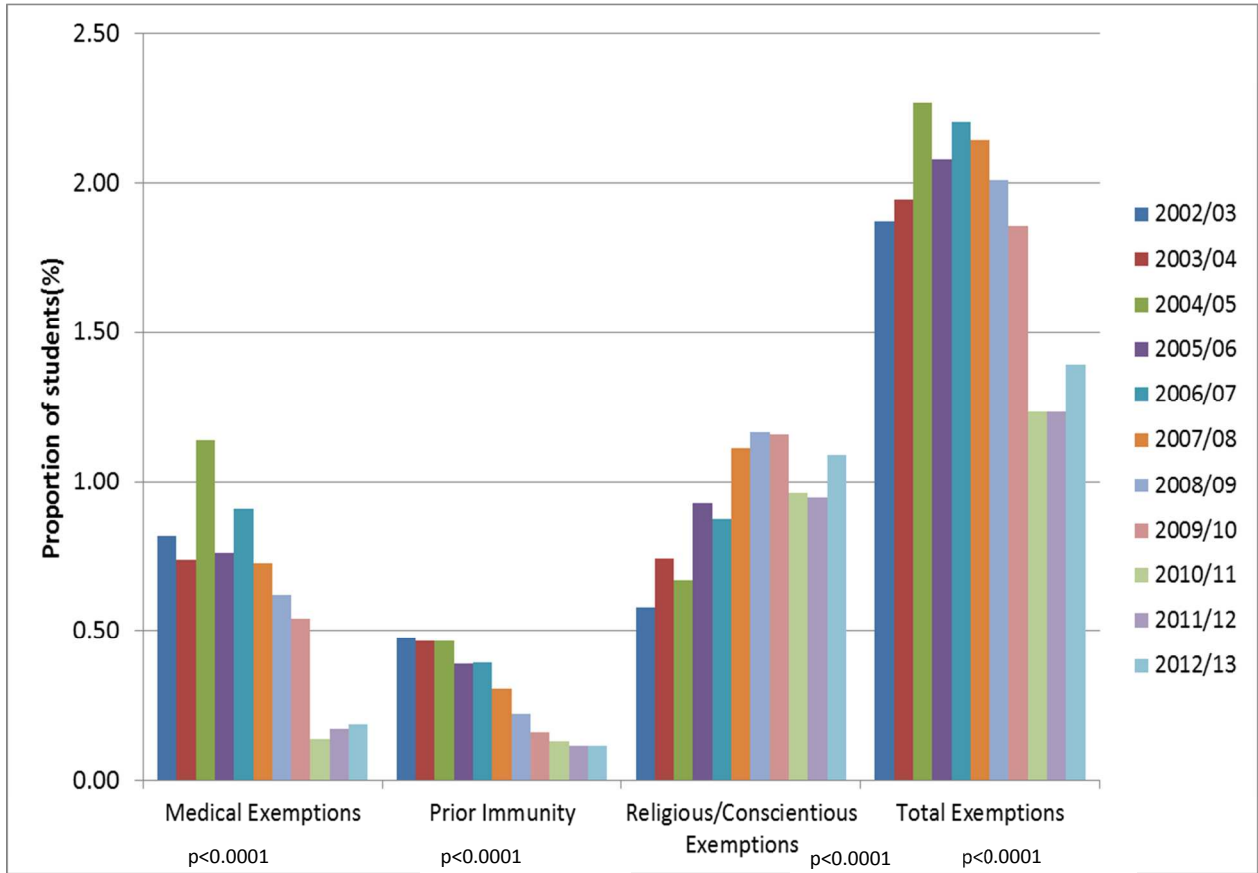

Figure 3B: Temporal trends in immunization exemptions to measles containing vaccine among 7-year-old Ontario students, by exemption classification: 2002-3 to 2012-13 school years

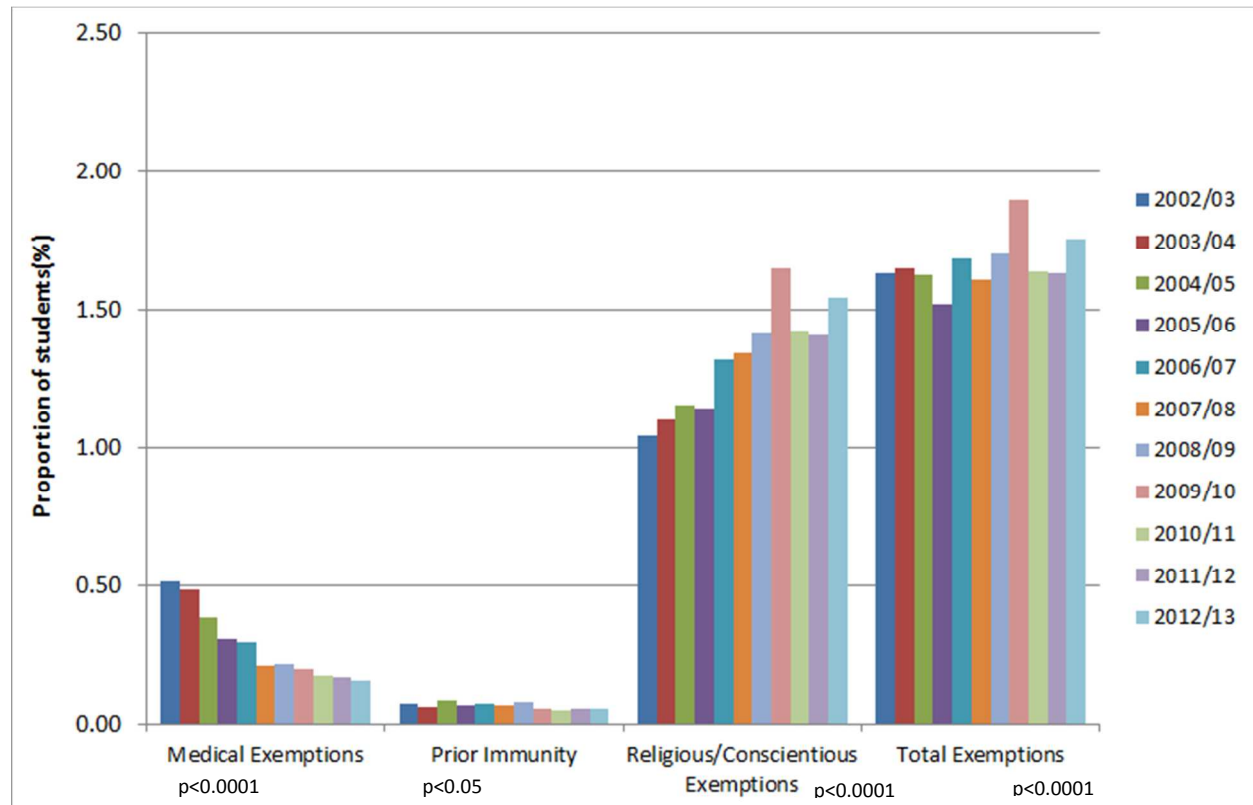

1  
2  
3  
4  
5  
6  
7  
8  
9  
10  
11  
12  
13  
14  
15  
16  
17  
18  
19  
20  
21  
22  
23  
24  
25  
26  
27  
28  
29  
30  
31  
32  
33  
34  
35  
36  
37  
38  
39  
40  
41  
42  
43  
44  
45  
46  
47  
48  
49  
50  
51  
52  
53  
54  
55  
56  
57  
58  
59  
60

**Figure 4A: Temporal trends in immunization exemptions to measles containing vaccine due to religious or conscientious belief among Ontario students by year of birth: 1985-2005**

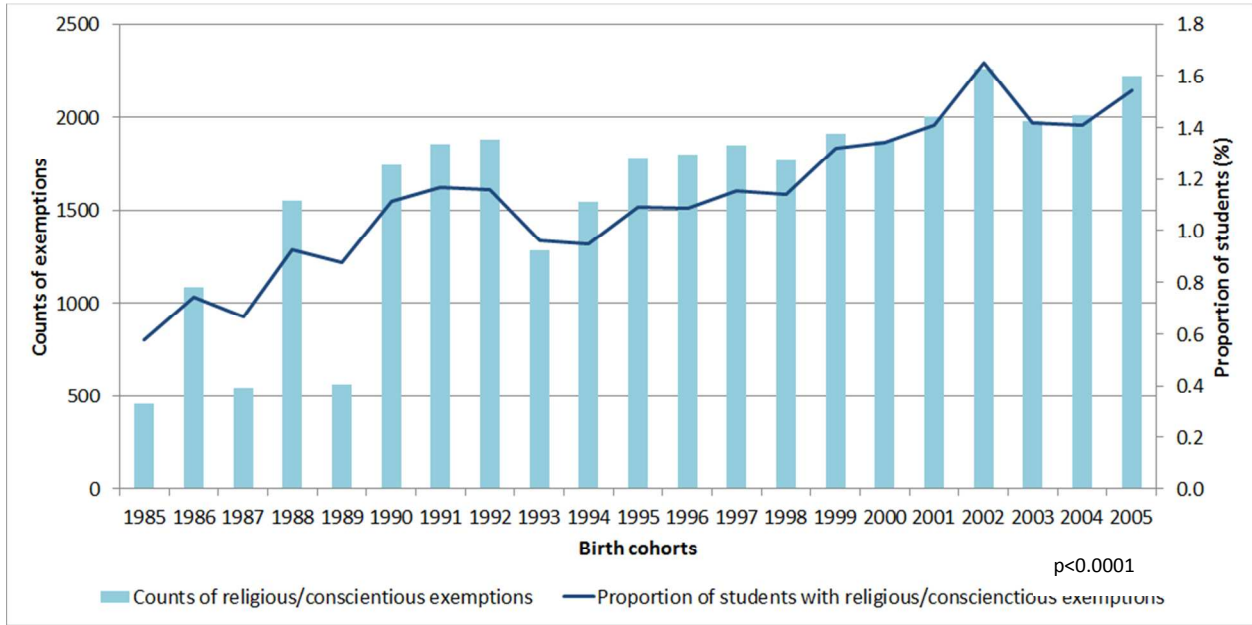

Confidential

Figure 4B: Temporal trends in medical exemptions to measles containing vaccine among Ontario students by year of birth: 1985-2005

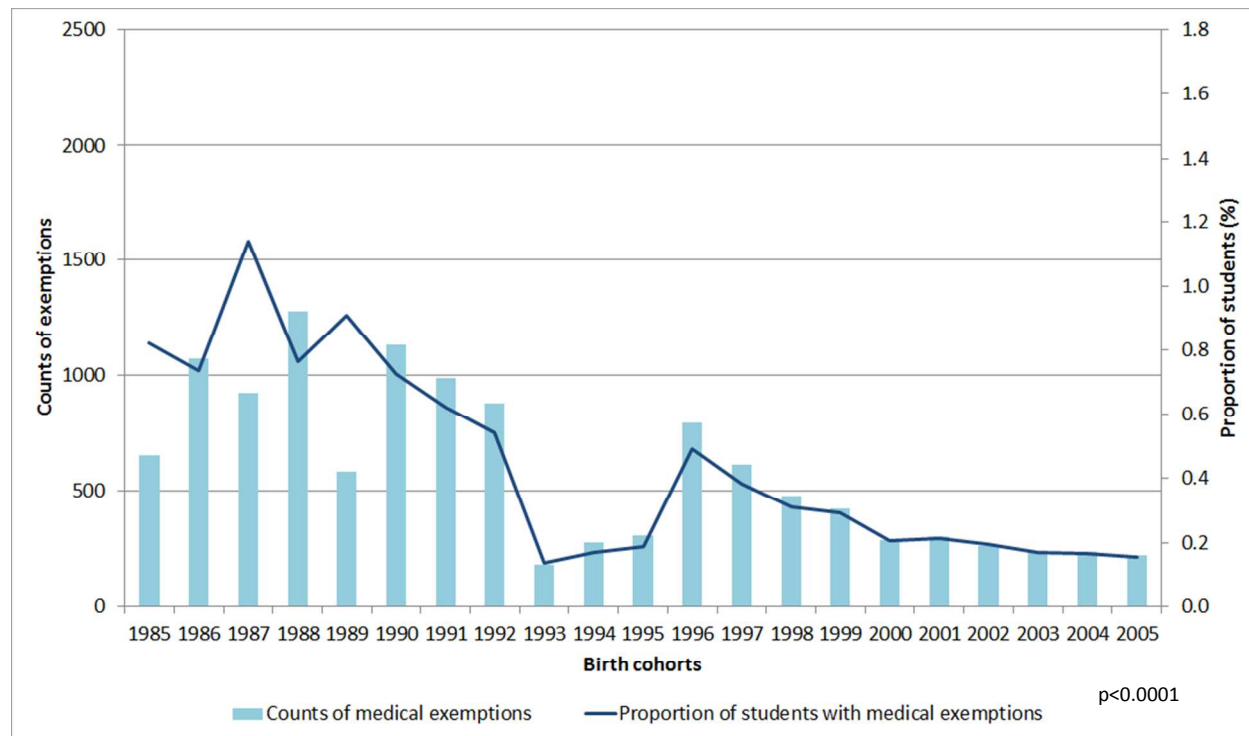

## STROBE Statement—checklist of items that should be included in reports of observational studies

|                              | Item No | Recommendation                                                                                                                                                                                                                                                                                                                                                                                                                                                                                                                                                                                                                                                                                   |
|------------------------------|---------|--------------------------------------------------------------------------------------------------------------------------------------------------------------------------------------------------------------------------------------------------------------------------------------------------------------------------------------------------------------------------------------------------------------------------------------------------------------------------------------------------------------------------------------------------------------------------------------------------------------------------------------------------------------------------------------------------|
| <b>Title and abstract</b>    | 1       | (a) Indicate the study's design with a commonly used term in the title or the abstract<br>(b) Provide in the abstract an informative and balanced summary of what was done and what was found                                                                                                                                                                                                                                                                                                                                                                                                                                                                                                    |
| <b>Introduction</b>          |         |                                                                                                                                                                                                                                                                                                                                                                                                                                                                                                                                                                                                                                                                                                  |
| Background/rationale         | 2       | Explain the scientific background and rationale for the investigation being reported                                                                                                                                                                                                                                                                                                                                                                                                                                                                                                                                                                                                             |
| Objectives                   | 3       | State specific objectives, including any prespecified hypotheses                                                                                                                                                                                                                                                                                                                                                                                                                                                                                                                                                                                                                                 |
| <b>Methods</b>               |         |                                                                                                                                                                                                                                                                                                                                                                                                                                                                                                                                                                                                                                                                                                  |
| Study design                 | 4       | Present key elements of study design early in the paper                                                                                                                                                                                                                                                                                                                                                                                                                                                                                                                                                                                                                                          |
| Setting                      | 5       | Describe the setting, locations, and relevant dates, including periods of recruitment, exposure, follow-up, and data collection                                                                                                                                                                                                                                                                                                                                                                                                                                                                                                                                                                  |
| Participants                 | 6       | (a) <i>Cohort study</i> —Give the eligibility criteria, and the sources and methods of selection of participants. Describe methods of follow-up<br><i>Case-control study</i> —Give the eligibility criteria, and the sources and methods of case ascertainment and control selection. Give the rationale for the choice of cases and controls<br><i>Cross-sectional study</i> —Give the eligibility criteria, and the sources and methods of selection of participants<br>(b) <i>Cohort study</i> —For matched studies, give matching criteria and number of exposed and unexposed<br><i>Case-control study</i> —For matched studies, give matching criteria and the number of controls per case |
| Variables                    | 7       | Clearly define all outcomes, exposures, predictors, potential confounders, and effect modifiers. Give diagnostic criteria, if applicable                                                                                                                                                                                                                                                                                                                                                                                                                                                                                                                                                         |
| Data sources/<br>measurement | 8*      | For each variable of interest, give sources of data and details of methods of assessment (measurement). Describe comparability of assessment methods if there is more than one group                                                                                                                                                                                                                                                                                                                                                                                                                                                                                                             |
| Bias                         | 9       | Describe any efforts to address potential sources of bias                                                                                                                                                                                                                                                                                                                                                                                                                                                                                                                                                                                                                                        |
| Study size                   | 10      | Explain how the study size was arrived at                                                                                                                                                                                                                                                                                                                                                                                                                                                                                                                                                                                                                                                        |
| Quantitative variables       | 11      | Explain how quantitative variables were handled in the analyses. If applicable, describe which groupings were chosen and why                                                                                                                                                                                                                                                                                                                                                                                                                                                                                                                                                                     |
| Statistical methods          | 12      | (a) Describe all statistical methods, including those used to control for confounding<br>(b) Describe any methods used to examine subgroups and interactions<br>(c) Explain how missing data were addressed<br>(d) <i>Cohort study</i> —If applicable, explain how loss to follow-up was addressed<br><i>Case-control study</i> —If applicable, explain how matching of cases and controls was addressed<br><i>Cross-sectional study</i> —If applicable, describe analytical methods taking account of sampling strategy<br>(e) Describe any sensitivity analyses                                                                                                                                |

Continued on next page



**Results**

|                  |     |                                                                                                                                                                                                                                                                                                                                                                                                               |
|------------------|-----|---------------------------------------------------------------------------------------------------------------------------------------------------------------------------------------------------------------------------------------------------------------------------------------------------------------------------------------------------------------------------------------------------------------|
| Participants     | 13* | (a) Report numbers of individuals at each stage of study—eg numbers potentially eligible, examined for eligibility, confirmed eligible, included in the study, completing follow-up, and analysed<br>(b) Give reasons for non-participation at each stage<br>(c) Consider use of a flow diagram                                                                                                               |
| Descriptive data | 14* | (a) Give characteristics of study participants (eg demographic, clinical, social) and information on exposures and potential confounders<br>(b) Indicate number of participants with missing data for each variable of interest<br>(c) <i>Cohort study</i> —Summarise follow-up time (eg, average and total amount)                                                                                           |
| Outcome data     | 15* | <i>Cohort study</i> —Report numbers of outcome events or summary measures over time<br><i>Case-control study</i> —Report numbers in each exposure category, or summary measures of exposure<br><i>Cross-sectional study</i> —Report numbers of outcome events or summary measures                                                                                                                             |
| Main results     | 16  | (a) Give unadjusted estimates and, if applicable, confounder-adjusted estimates and their precision (eg, 95% confidence interval). Make clear which confounders were adjusted for and why they were included<br>(b) Report category boundaries when continuous variables were categorized<br>(c) If relevant, consider translating estimates of relative risk into absolute risk for a meaningful time period |
| Other analyses   | 17  | Report other analyses done—eg analyses of subgroups and interactions, and sensitivity analyses                                                                                                                                                                                                                                                                                                                |

**Discussion**

|                  |    |                                                                                                                                                                            |
|------------------|----|----------------------------------------------------------------------------------------------------------------------------------------------------------------------------|
| Key results      | 18 | Summarise key results with reference to study objectives                                                                                                                   |
| Limitations      | 19 | Discuss limitations of the study, taking into account sources of potential bias or imprecision. Discuss both direction and magnitude of any potential bias                 |
| Interpretation   | 20 | Give a cautious overall interpretation of results considering objectives, limitations, multiplicity of analyses, results from similar studies, and other relevant evidence |
| Generalisability | 21 | Discuss the generalisability (external validity) of the study results                                                                                                      |

**Other information**

|         |    |                                                                                                                                                               |
|---------|----|---------------------------------------------------------------------------------------------------------------------------------------------------------------|
| Funding | 22 | Give the source of funding and the role of the funders for the present study and, if applicable, for the original study on which the present article is based |
|---------|----|---------------------------------------------------------------------------------------------------------------------------------------------------------------|

\*Give information separately for cases and controls in case-control studies and, if applicable, for exposed and unexposed groups in cohort and cross-sectional studies.

**Note:** An Explanation and Elaboration article discusses each checklist item and gives methodological background and published examples of transparent reporting. The STROBE checklist is best used in conjunction with this article (freely available on the Web sites of PLoS Medicine at <http://www.plosmedicine.org/>, Annals of Internal Medicine at <http://www.annals.org/>, and Epidemiology at <http://www.epidem.com/>). Information on the STROBE Initiative is available at [www.strobe-statement.org](http://www.strobe-statement.org).

First author statement (SW): We feel that our analyses generally conform to the checklist and that the manuscript clearly articulates the data quality issues within our provincial surveillance system which prohibited us from completing additional analyses that would only have been possible with individual-level data (i.e. adjustment for confounders, sub-

1  
2  
3  
4  
5  
6  
7  
8  
9  
10  
11  
12  
13  
14  
15  
16  
17  
18  
19  
20  
21  
22  
23  
24  
25  
26  
27  
28  
29  
30  
31  
32  
33  
34  
35  
36  
37  
38  
39  
40  
41  
42  
43  
44  
45  
46  
47  
48  
49  
50  
51  
52  
53  
54  
55  
56  
57  
58  
59  
60

group analyses, etc.). The limitations of the data source and its implications for analyses are cited in both the methods and given prominent mention in the discussion section.

Confidential

# CMAJ OPEN

## Publication Agreement

THIS AGREEMENT dated the \_\_\_ day of \_\_\_\_\_, 20\_\_\_, is made between the Canadian Medical Association ("CMA"), a company incorporated under the laws of Canada, having its head office at 1867 Alta Vista Drive, Ottawa, Ontario, K1G 5W8,

- and -

Ontario Agency of Health Protection and Promotion (OAHPP)  
480 University Ave. Toronto, Ont. M5G 1V2

**Sarah Wilson, Chi Yon Seo, Gillian Lim, Jill Fediurek, Natasha Crowcroft and Shelley Deeks (the "Authors") have carried out research and prepared a paper entitled**

**Trends in medical and non-medical immunization exemptions in Ontario: Annual cross-sectional assessment of students over eleven school years: 2002-03 to 2012-13. (CMAJOpen-2013-0087) (the "Paper");**

The Authors and have submitted the Paper to CMA for publication in *CMAJ Open* (the "Journal");

In consideration of the mutual promises and covenants contained in this Agreement, the parties agree as follows:

### 1. Grant of Rights

- 1.1 OAHPP grants to CMA a non-exclusive licence to print, reproduce, publish, transmit and distribute the Paper throughout the world, in any form and by any means, in hard print, mechanically, reprographically, electronically or otherwise, in any language, as part of the Journal. OAHPP expressly reserves copyright in the Paper.
- 1.2 OAHPP further grants to CMA the right to give and grant sublicences of any and all of the rights granted to CMA under this Agreement.
- 1.3 The duration of the rights granted under this Agreement shall be for the full term

1  
2  
3  
4  
5  
6  
7  
8  
9  
10  
11  
12  
13  
14  
15  
16  
17  
18  
19  
20  
21  
22  
23  
24  
25  
26  
27  
28  
29  
30  
31  
32  
33  
34  
35  
36  
37  
38  
39  
40  
41  
42  
43  
44  
45  
46  
47  
48  
49  
50  
51  
52  
53  
54  
55  
56  
57  
58  
59  
60

of copyright in the Paper, and any renewals of that copyright.

**2. OAHP's Representations and Warranties**

OAHP represents and warrants to CMA:

- (a) that the Author(s) is/are (**check one**) \_\_\_ the sole author(s) [**or**]  a co-author(s) of the Paper, and that the Paper was researched and prepared on behalf of, and in the course of his/her/their employment with, OAHP;
- (b) that OAHP is (**check one**)  the sole owner [**or**] \_\_\_ a co-owner of copyright in the Paper;
- (c) that the Paper is an original work of authorship, and does not plagiarize any other work or infringe any copyright, trademark or other proprietary right of any third party; and
- (d) that the Paper does not contain any libellous or unlawful matter, and does not violate the privacy rights of any third party.

**3. CMA Covenants**

3.1 CMA covenants that the source of the Paper, namely, the Author(s) and OAHP, will be clearly indicated in the Journal, as distributed by CMA, and that CMA will use its best efforts to ensure that its sublicensees clearly indicate the source of the Paper.

**ACCEPTED AND AGREED TO** as of the day, month and year first above written.

Canadian Medical Association

By: 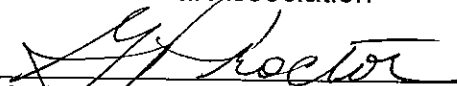  
Publisher

Ontario Agency for Health Protection and Promotion

By: 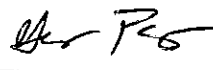  
George Pasut, Vice President  
Science and Public Health
